# Supplementary material
Source: publisher figshare collection journal article supplement (https://frontiersin.figshare.com/ndownloader/files/13055981)
Supplement: Supplementary file [file 13055981]

| <b>Compound</b> | <b>Dose Level</b> | <b>Time</b> | <b>Pathology finding type</b>    |
|-----------------|-------------------|-------------|----------------------------------|
| carbamazepine   | Low               | 6 hr        | Cellular infiltration            |
| carbamazepine   | Low               | 6 hr        | Necrosis                         |
| carbamazepine   | Low               | 15 day      | Hypertrophy                      |
| carbamazepine   | Low               | 29 day      | Cellular infiltration            |
| carbamazepine   | Low               | 29 day      | Hypertrophy                      |
| carbamazepine   | Middle            | 8 day       | Necrosis                         |
| carbamazepine   | Middle            | 15 day      | Hypertrophy                      |
| carbamazepine   | Middle            | 15 day      | Necrosis                         |
| carbamazepine   | Middle            | 29 day      | Hypertrophy                      |
| carbamazepine   | High              | 6 hr        | Cellular infiltration            |
| carbamazepine   | High              | 24 hr       | Cellular infiltration            |
| carbamazepine   | High              | 4 day       | Cellular infiltration            |
| carbamazepine   | High              | 8 day       | Hypertrophy                      |
| carbamazepine   | High              | 15 day      | Granuloma                        |
| carbamazepine   | High              | 15 day      | Hypertrophy                      |
| carbamazepine   | High              | 29 day      | Hypertrophy                      |
| diclofenac      | Low               | 8 day       | Cellular infiltration            |
| diclofenac      | Low               | 8 day       | Necrosis                         |
| diclofenac      | Low               | 15 day      | Cellular infiltration            |
| diclofenac      | Middle            | 4 day       | Necrosis                         |
| diclofenac      | Middle            | 4 day       | Nodule,<br>hepatodiaphragmatic   |
| diclofenac      | Middle            | 8 day       | Necrosis                         |
| diclofenac      | Middle            | 29 day      | Cellular infiltration            |
| diclofenac      | High              | 8 day       | Cellular infiltration            |
| diclofenac      | High              | 8 day       | Scar                             |
| diclofenac      | High              | 15 day      | Cellular infiltration            |
| indomethacin    | Low               | 9 hr        | Necrosis                         |
| indomethacin    | High              | 24 hr       | Nodule,<br>hepatodiaphragmatic   |
| indomethacin    | High              | 8 day       | Change, basophilic               |
| indomethacin    | High              | 8 day       | DEAD                             |
| indomethacin    | High              | 8 day       | Inflammation,<br>suppurative     |
| indomethacin    | High              | 15 day      | Change, basophilic               |
| indomethacin    | High              | 15 day      | DEAD                             |
| indomethacin    | High              | 15 day      | Inflammation,<br>suppurative     |
| indomethacin    | High              | 15 day      | Necrosis                         |
| naproxen        | High              | 24 hr       | Hematopoiesis,<br>extramedullary |
| naproxen        | High              | 4 day       | Hematopoiesis,<br>extramedullary |
| naproxen        | High              | 4 day       | Hypertrophy                      |
| naproxen        | High              | 4 day       | Inflammation                     |
| naproxen        | High              | 4 day       | Necrosis                         |

|            |        |        |                               |
|------------|--------|--------|-------------------------------|
| naproxen   | High   | 8 day  | DEAD                          |
| naproxen   | High   | 8 day  | Hematopoiesis, extramedullary |
| naproxen   | High   | 15 day | DEAD                          |
| naproxen   | High   | 15 day | Hematopoiesis, extramedullary |
| naproxen   | High   | 15 day |                               |
| nifedipine | Middle | 3 hr   | Increased mitosis             |
| nifedipine | Middle | 6 hr   | Increased mitosis             |
| nifedipine | Middle | 29 day | Change, eosinophilic          |
| nifedipine | High   | 3 hr   | Increased mitosis             |
| nifedipine | High   | 6 hr   | Increased mitosis             |
| nifedipine | High   | 9 hr   | Increased mitosis             |
| nifedipine | High   | 15 day | Change, eosinophilic          |
| nifedipine | High   | 29 day | Change, eosinophilic          |
| nimesulide | Low    | 3 hr   | Microgranuloma                |
| nimesulide | Low    | 6 hr   | Microgranuloma                |
| nimesulide | Low    | 9 hr   | Microgranuloma                |
| nimesulide | Low    | 24 hr  | Increased mitosis             |
| nimesulide | Low    | 24 hr  | Microgranuloma                |
| nimesulide | Low    | 4 day  | Microgranuloma                |
| nimesulide | Low    | 8 day  | Microgranuloma                |
| nimesulide | Low    | 15 day | Microgranuloma                |
| nimesulide | Low    | 15 day | Necrosis                      |
| nimesulide | Low    | 29 day | Fibrosis                      |
| nimesulide | Low    | 29 day | Microgranuloma                |
| nimesulide | Middle | 6 hr   | Microgranuloma                |
| nimesulide | Middle | 4 day  | Microgranuloma                |
| nimesulide | Middle | 8 day  | Hypertrophy                   |
| nimesulide | Middle | 8 day  | Microgranuloma                |
| nimesulide | Middle | 15 day | Hypertrophy                   |
| nimesulide | Middle | 15 day | Microgranuloma                |
| nimesulide | Middle | 15 day | Necrosis                      |
| nimesulide | Middle | 29 day | Ground glass appearance       |
| nimesulide | Middle | 29 day | Hypertrophy                   |
| nimesulide | Middle | 29 day | Microgranuloma                |
| nimesulide | Middle | 29 day | Necrosis                      |
| nimesulide | High   | 3 hr   | Increased mitosis             |
| nimesulide | High   | 6 hr   | Microgranuloma                |
| nimesulide | High   | 9 hr   | DEAD                          |
| nimesulide | High   | 4 day  | Hypertrophy                   |
| nimesulide | High   | 8 day  | DEAD                          |
| nimesulide | High   | 8 day  | Ground glass appearance       |
| nimesulide | High   | 8 day  | Hypertrophy                   |
| nimesulide | High   | 8 day  | Microgranuloma                |
| nimesulide | High   | 8 day  | Necrosis                      |

|            |      |        |                                   |
|------------|------|--------|-----------------------------------|
| nimesulide | High | 15 day | Ground glass appearance           |
| nimesulide | High | 15 day | Hypertrophy                       |
| nimesulide | High | 29 day | Ground glass appearance           |
| nimesulide | High | 29 day | Hypertrophy                       |
| nimesulide | High | 29 day | Microgranuloma                    |
| sulindac   | High | 24 hr  | Hypertrophy                       |
| sulindac   | High | 8 day  | Atrophy                           |
| sulindac   | High | 8 day  | Cellular infiltration, neutrophil |
| sulindac   | High | 15 day | DEAD                              |
| sulindac   | High | 15 day | Hematopoiesis, extramedullary     |
| sulindac   | High | 29 day | DEAD                              |
| sulindac   | High | 29 day | Hematopoiesis, extramedullary     |
| sulindac   | High | 29 day | Hypertrophy                       |
